# Supplementary material for: Fragebogen zu psychologischen Einflussfaktoren der Nutzung von Pkw, ÖPNV und Fahrrad (PsyVKN)
Source: Atypon-hosted journal article supplement (doi:10.1026/0012-1924/a000277), 2021-11-19
Supplement: 0012-1924_a000277_esm1.pdf [file 0012-1924_a000277_esm1.pdf]

**Tabelle E1.** Kurzbeschreibung der Projekte

| Code       | Projektkürzel          | Zeitraum    | Kurzbeschreibung Ziel der Studie                                                                                                                                   |
|------------|------------------------|-------------|--------------------------------------------------------------------------------------------------------------------------------------------------------------------|
| Studie I   | MOBILANZ               | 2002 – 2007 | Möglichkeiten zur Reduzierung des Energieverbrauches und der Stoffströme unterschiedlicher Mobilitätsstile durch zielgruppenspezifische Mobilitätsdienstleistungen |
| Studie II  | Marktforschung VRR     | 2007        | Zielgruppensegmentierung Verkehrsverbund Rhein-Ruhr                                                                                                                |
| Studie III | Marktforschung GVH     | 2007 – 2008 | Zielgruppensegmentierung Großraum-Verkehr Hannover                                                                                                                 |
| Studie IV  | Marktforschung MVG     | 2008        | Zielgruppensegmentierung Münchner Verkehrsgesellschaft                                                                                                             |
| Studie V   | Renaissance der Städte | 2009 – 2010 | Chancen des ÖPNV in Zeiten einer Renaissance der Städte                                                                                                            |
| Studie VI  | EMIGMA                 | 2010 – 2013 | Empowerment von Migranten zum Klimaschutz                                                                                                                          |

### Studie I

Forschungsprojekt „Möglichkeiten zur Reduzierung des Energieverbrauches und der Stoffströme unterschiedlicher Mobilitätsstile durch zielgruppenspezifische Mobilitätsdienstleistungen“ (MOBILANZ)

Gefördert vom BMBF im Zeitraum 2002 bis 2007

Veröffentlichungen:

Hunecke, M., Haustein, S., Grischkat, S. & Böhler, S. (2007). Psychological, sociodemographic, and infrastructural factors as determinants of ecological impact caused by mobility behavior. *Journal of Environmental Psychology*, 27, 277–292. <https://doi.org/10.1016/j.jenvp.2007.08.001>

Haustein, S. & Hunecke, M. (2007). Reduced use of environmentally friendly modes of transportation caused by perceived mobility necessities - An extension of the theory of planned behavior. *Journal of Applied Social Psychology*, 37, 1856–1883. <https://doi.org/10.1111/j.1559-1816.2007.00241.x>

Haustein, S., Hunecke, M. & Manz, W. (2007). Einfluss der Wetterlage und der Wetterempfindlichkeit auf die Verkehrsmittelnutzung. *Internationales Verkehrswesen*, 59(9), 392–396.

Hunecke, M., Haustein, S., Böhler, S. & Grischkat, S. (2010). An attitude based target group approach to reduce the ecological impact of daily mobility behavior. *Environment and Behavior*, 42, 3–43. <https://doi.org/10.1177/0013916508319587>

### Studie II

Zielgruppensegmentierung Verkehrsverbund Rhein-Ruhr (VRR)

im Auftrag der Marktforschung des VRR

Veröffentlichungen:

interner Bericht für den Verkehrsverbund VRR

### Studie III

Zielgruppensegmentierung Verkehrsverbund Großraum-Verkehr Hannover(GVH)

im Auftrag der Marktforschung des GVH im Jahr 2007 bis 2008

Veröffentlichungen:

interner Bericht für den Verkehrsverbund GVH

#### **Studie IV**

Zielgruppensegmentierung Münchener Verkehrsbetriebe (MVG)

im Auftrag der Marktforschung der MVG im Jahr 2008

Veröffentlichungen:

interner Bericht für das Verkehrsunternehmen MVG

#### **Studie V**

Forschungsprojekt „Chancen des ÖPNV in Zeiten einer Renaissance der Städte“

gefördert vom BMVBS im Zeitraum 2009 bis 2010

Veröffentlichungen:

BMVBS (Hrsg.). *Chancen des ÖPNV in Zeiten einer Renaissance der Städte*. BMVBS-Online-Publikation 1/2012. Zugriff am 21.03.2021 unter

<https://www.bbsr.bund.de/BBSR/DE/veroeffentlichungen/ministerien/bmvbs/bmvbs-online/2012/ON012012.html;jsessionid=F03180D2EF08BD36158417D441C3DF68.live11293?nn=2866908>

#### **Studie VI**

Empowerment von MigrantInnen zum Klimaschutz (EMIGMA)

gefördert vom BMBF im Zeitraum 2010 bis 2013

Veröffentlichungen:

Hunecke, M. & Ziesenitz, A. (2014). Mobilitätsbezogene Einstellungen, Verhalten und CO<sub>2</sub>-Emissionen von russischsprachigen und türkeistämmigen Migrant\_innen. In M. Hunecke & A. Toprak (Hrsg.), *Empowerment von Migrant\_innen zum Klimaschutz* (S. 51-76). München: oekom.
