# Supplementary material for: Fragebogen zu psychologischen Einflussfaktoren der Nutzung von Pkw, ÖPNV und Fahrrad (PsyVKN)
Source: Atypon-hosted journal article supplement (doi:10.1026/0012-1924/a000277), 2021-11-19
Supplement: 0012-1924_a000277_esm3.pdf [file 0012-1924_a000277_esm3.pdf]

| Studie | Kürzel   | Outcome    | Predictor | Path Values | Std. Fehler | z       | sig   | p     | lower CI | Upper CI |
|--------|----------|------------|-----------|-------------|-------------|---------|-------|-------|----------|----------|
| I      | MOBILANZ | relMIVges  | PersNorm  | -,034       | ,008        | -1,214  |       | ,225  | -,026    | ,006     |
|        |          |            | SozNorm   | ,022        | ,019        | 0,614   |       | ,539  | -,026    | ,049     |
|        |          |            | PBC       | -,601       | ,011        | -17,169 | ***   | ,000  | -,202    | -,160    |
|        |          |            | PMN       | -,037       | ,008        | -1,349  |       | ,177  | -,027    | ,005     |
|        |          |            | WetRes    | -,183       | ,011        | -7,296  | ***   | ,000  | -,101    | -,058    |
|        |          |            | RadErl    | ,035        | ,009        | 1,697   |       | ,090  | -,002    | ,033     |
|        |          |            | PKWOri    | -,116       | ,009        | -5,282  | ***   | ,000  | -,062    | -,029    |
|        |          | PrvtOV     | ,009      | ,009        | 0,450       |         | ,653  | -,014 | ,022     |          |
|        |          | relOVges   | PersNorm  | ,055        | ,007        | 1,614   |       | ,107  | -,002    | ,024     |
|        |          |            | SozNorm   | -,005       | ,016        | -,124   |       | ,902  | -,033    | ,029     |
|        |          |            | PBC       | ,555        | ,008        | 13,356  | ***   | ,000  | ,095     | ,128     |
|        |          |            | PMN       | -,204       | ,007        | -6,042  | ***   | ,000  | -,053    | -,027    |
|        |          |            | WetRes    | -,080       | ,009        | -2,637  | **    | ,008  | -,040    | -,006    |
|        |          |            | RadErl    | -,094       | ,007        | -3,692  | ***   | ,000  | -,041    | -,013    |
|        |          |            | PKWOri    | -,012       | ,007        | -,438   |       | ,662  | -,017    | ,011     |
|        |          | PrvtOV     | ,000      | ,007        | ,005        |         | ,996  | -,015 | ,015     |          |
|        |          | relNMIVges | PersNorm  | ,000        | ,008        | ,016    |       | ,988  | -,016    | ,016     |
|        |          |            | SozNorm   | -,024       | ,019        | -,622   |       | ,534  | -,050    | ,026     |
|        |          |            | PBC       | ,248        | ,010        | 6,786   | ***   | ,000  | ,047     | ,086     |
|        |          |            | PMN       | ,197        | ,008        | 6,442   | ***   | ,000  | ,036     | ,067     |
|        |          |            | WetRes    | ,268        | ,011        | 9,264   | ***   | ,000  | ,081     | ,125     |
| RadErl | ,032     |            | ,009      | 1,383       |             | ,167    | -,005 | ,030  |          |          |
| PKWOri | ,136     |            | ,009      | 5,521       | ***         | ,000    | ,031  | ,065  |          |          |
| PrvtOV | -,003    | ,009       | -,132     |             | ,895        | -,019   | ,017  |       |          |          |
| Studie | Kürzel   | Outcome    | Predictor | Path Values | Std. Fehler | z       | sig   | p     | lower CI | Upper CI |
|        |          | relMIVges  | PersNorm  | -,111       | ,013        | -2,848  | **    | ,004  | -,062    | -,011    |
|        |          |            | SozNorm   | -,001       | ,026        | -0,017  |       | ,987  | -,051    | ,050     |
|        |          |            | PBC       | -,619       | ,016        | -11,888 | ***   | ,000  | -,221    | -,159    |
|        |          |            | PMN       | -,030       | ,012        | -0,756  |       | ,450  | -,034    | ,015     |
|        |          |            | WetRes    | -,100       | ,011        | -2,753  | **    | ,006  | -,052    | -,009    |
|        |          |            | RadErl    | -,030       | ,011        | -0,944  |       | ,345  | -,031    | ,011     |
|        |          |            | PKWOri    | -,053       | ,012        | -1,601  |       | ,109  | -,043    | ,004     |
|        |          |            | PrvtOV    | ,061        | ,012        | 1,922   |       | ,055  | ,000     | ,048     |

| Studie     | Kürzel     | Outcome   | Predictor | Path Values | Std. Fehler | z       | sig   | p     | lower CI | Upper CI |
|------------|------------|-----------|-----------|-------------|-------------|---------|-------|-------|----------|----------|
| II         | VRR        | relOVges  | PersNorm  | ,026        | ,011        | ,574    |       | ,566  | -,015    | ,028     |
|            |            |           | SozNorm   | ,081        | ,021        | 1,376   |       | ,169  | -,012    | ,070     |
|            |            |           | PBC       | ,534        | ,012        | 9,183   | ***   | ,000  | ,087     | ,135     |
|            |            |           | PMN       | -,175       | ,010        | -3,769  | ***   | ,000  | -,058    | -,018    |
|            |            |           | WetRes    | -,040       | ,009        | -,933   |       | ,351  | -,026    | ,009     |
|            |            |           | RadErl    | -,120       | ,009        | -3,088  | **    | ,002  | -,044    | -,010    |
|            |            |           | PKWOri    | ,064        | ,010        | 1,664   |       | ,096  | -,003    | ,035     |
|            |            |           | PrvtOV    | -,046       | ,010        | -1,228  |       | ,220  | -,032    | ,007     |
|            | relNMIVges | PersNorm  | ,103      | ,013        | 2,299       | *       | ,022  | ,005  | ,057     |          |
|            |            | SozNorm   | -,056     | ,026        | -,979       |         | ,328  | -,077 | ,026     |          |
|            |            | PBC       | ,276      | ,015        | 5,005       | ***     | ,000  | ,045  | ,102     |          |
|            |            | PMN       | ,181      | ,013        | 4,018       | ***     | ,000  | ,026  | ,075     |          |
|            |            | WetRes    | ,155      | ,011        | 3,716       | ***     | ,000  | ,020  | ,063     |          |
|            |            | RadErl    | ,120      | ,011        | 3,276       | **      | ,001  | ,014  | ,057     |          |
|            |            | PKWOri    | ,011      | ,012        | ,290        |         | ,772  | -,020 | ,027     |          |
|            |            | PrvtOV    | -,034     | ,012        | -,942       |         | ,346  | -,036 | ,013     |          |
| III        | GVH        | relMIVges | PersNorm  | -,017       | ,010        | -0,620  |       | ,536  | -,026    | ,013     |
|            |            |           | SozNorm   | ,007        | ,016        | 0,245   |       | ,807  | -,028    | ,036     |
|            |            |           | PBC       | -,553       | ,010        | -18,119 | ***   | ,000  | -,202    | -,162    |
|            |            |           | PMN       | -,064       | ,008        | -2,439  |       | ,015  | -,037    | -,004    |
|            |            |           | WetRes    | -,141       | ,011        | -5,090  | ***   | ,000  | -,080    | -,035    |
|            |            |           | RadErl    | ,023        | ,011        | 0,836   |       | ,403  | -,012    | ,031     |
|            |            |           | PKWOri    | -,081       | ,010        | -3,330  | **    | ,001  | -,053    | -,014    |
|            |            |           | PrvtOV    | ,049        | ,011        | 1,937   |       | ,053  | ,000     | ,043     |
|            | relOVges   | PersNorm  | -,014     | ,010        | -,462       |         | ,644  | -,024 | ,015     |          |
|            |            | SozNorm   | ,104      | ,016        | 3,110       | **      | ,002  | ,019  | ,082     |          |
|            |            | PBC       | ,546      | ,010        | 16,440      | ***     | ,000  | ,140  | ,178     |          |
|            |            | PMN       | -,250     | ,009        | -8,394      | ***     | ,000  | -,089 | -,055    |          |
|            |            | WetRes    | -,178     | ,011        | -5,694      | ***     | ,000  | -,085 | -,042    |          |
|            |            | RadErl    | -,077     | ,011        | -2,471      | *       | ,013  | -,048 | -,006    |          |
|            |            | PKWOri    | ,084      | ,010        | 3,157       | **      | ,002  | ,012  | ,050     |          |
|            |            | PrvtOV    | -,047     | ,011        | -1,719      |         | ,086  | -,039 | ,003     |          |
| relNMIVges | PersNorm   | ,034      | ,011      | 1,121       |             | ,262    | -,009 | ,033  |          |          |

| Studie | Kürzel | Outcome    | Predictor | Path Values | Std. Fehler | z       | sig  | p    | lower CI | Upper CI |
|--------|--------|------------|-----------|-------------|-------------|---------|------|------|----------|----------|
|        |        |            | SozNorm   | -,102       | ,018        | -3,013  | **   | ,003 | -,088    | -,019    |
|        |        |            | PBC       | ,066        | ,010        | 2,099   | *    | ,036 | ,001     | ,040     |
|        |        |            | PMN       | ,297        | ,009        | 9,991   | ***  | ,000 | ,076     | ,113     |
|        |        |            | WetRes    | ,309        | ,013        | 9,683   | ***  | ,000 | ,097     | ,147     |
|        |        |            | RadErl    | ,044        | ,012        | 1,399   |      | ,162 | -,007    | ,040     |
|        |        |            | PKWOri    | ,007        | ,011        | ,257    |      | ,797 | -,018    | ,024     |
|        |        |            | PrvtOV    | -,007       | ,012        | -,256   |      | ,798 | -,026    | ,020     |
| Studie | Kürzel | Outcome    | Predictor | Path Values | Std. Fehler | z       | sig  | p    | lower CI | Upper CI |
| IV     | MVG    | relMIVges  | PersNorm  | -,026       | ,008        | -,922   |      | ,357 | -,022    | ,008     |
|        |        |            | SozNorm   | ,041        | ,018        | 1,112   |      | ,266 | -,015    | ,054     |
|        |        |            | PBC       | -,663       | ,010        | -18,953 | ***  | ,000 | -,207    | -,168    |
|        |        |            | PMN       | ,041        | ,007        | 1,568   |      | ,117 | -,003    | ,023     |
|        |        |            | WetRes    | -,061       | ,009        | -2,482  | *    | ,013 | -,041    | -,005    |
|        |        |            | RadErl    | -,009       | ,008        | -,348   |      | ,728 | -,018    | ,013     |
|        |        |            | PKWOri    | -,133       | ,007        | -4,876  | ***  | ,000 | -,050    | -,021    |
|        |        | relOVges   | PrvtOV    | ,070        | ,009        | 2,625   | *    | ,009 | ,006     | ,042     |
|        |        |            | PersNorm  | -,009       | ,008        | -,272   |      | ,785 | -,018    | ,013     |
|        |        |            | SozNorm   | ,025        | ,018        | ,596    |      | ,551 | -,025    | ,046     |
|        |        |            | PBC       | ,537        | ,010        | 14,107  | ***  | ,000 | ,117     | ,155     |
|        |        |            | PMN       | -,137       | ,007        | -4,349  | ***  | ,000 | -,045    | -,017    |
|        |        |            | WetRes    | -,156       | ,010        | -5,223  | ***  | ,000 | -,070    | -,032    |
|        |        |            | RadErl    | -,086       | ,008        | -2,734  | **   | ,006 | -,039    | -,006    |
|        |        | relNMIVges | PKWOri    | ,065        | ,007        | 2,081   | *    | ,037 | ,001     | ,030     |
|        |        |            | PrvtOV    | -,086       | ,009        | -2,793  | **   | ,005 | -,044    | -,008    |
|        |        |            | PersNorm  | ,044        | ,008        | 1,269   |      | ,205 | -,005    | ,024     |
|        |        |            | SozNorm   | -,074       | ,017        | -1,677  |      | ,094 | -,061    | ,005     |
|        |        |            | PBC       | ,214        | ,008        | 5,869   | ***  | ,000 | ,033     | ,066     |
|        |        |            | PMN       | ,098        | ,007        | 3,123   | **   | ,002 | ,008     | ,033     |
|        |        |            | WetRes    | ,256        | ,009        | 7,849   | ***  | ,000 | ,056     | ,093     |
| RadErl | ,100   | ,008       | 3,035     | **          | ,002        | ,009    | ,040 |      |          |          |
| PKWOri | ,088   | ,007       | 2,786     | **          | ,005        | ,006    | ,033 |      |          |          |
| PrvtOV | ,023   | ,009       | ,769      |             | ,442        | -,010   | ,024 |      |          |          |
| Studie | Kürzel | Outcome    | Predictor | Path Values | Std. Fehler | z       | sig  | p    | lower CI | Upper CI |
|        |        | relMIVges  | PersNorm  | -,017       | ,006        | -,817   |      | ,414 | -,016    | ,006     |

|   |     |            |          |       |      |         |     |      |       |       |
|---|-----|------------|----------|-------|------|---------|-----|------|-------|-------|
|   |     |            | SozNorm  | ,012  | ,008 | ,525    |     | ,599 | -,012 | ,021  |
|   |     |            | PBC      | -,721 | ,007 | -27,181 | *** | ,000 | -,217 | -,188 |
|   |     |            | PMN      | ,024  | ,009 | 1,139   |     | ,255 | -,008 | ,029  |
|   |     |            | WetRes   | -,139 | ,010 | -4,831  | *** | ,000 | -,071 | -,030 |
|   |     |            | RadErl   | -,018 | ,009 | -,671   |     | ,502 | -,024 | ,012  |
|   |     |            | PKWOri   | -,072 | ,006 | -3,713  | *** | ,000 | -,033 | -,010 |
|   |     |            | PrvtOV   | ,026  | ,007 | 1,485   |     | ,138 | -,003 | ,025  |
|   |     | relOVges   | PersNorm | ,043  | ,005 | 1,660   |     | ,097 | -,001 | ,018  |
|   |     |            | SozNorm  | -,007 | ,007 | -,241   |     | ,809 | -,016 | ,013  |
|   |     |            | PBC      | ,687  | ,006 | 21,684  | *** | ,000 | ,126  | ,152  |
|   |     |            | PMN      | -,184 | ,008 | -6,744  | *** | ,000 | -,073 | -,040 |
| V |     |            | WetRes   | -,351 | ,010 | -9,252  | *** | ,000 | -,110 | -,072 |
|   | RdS |            | RadErl   | -,048 | ,008 | -1,408  |     | ,159 | -,028 | ,005  |
|   |     |            | PKWOri   | ,084  | ,005 | 3,544   | *** | ,000 | ,008  | ,028  |
|   |     |            | PrvtOV   | -,037 | ,006 | -1,741  |     | ,082 | -,023 | ,001  |
|   |     | relNMIVges | PersNorm | -,012 | ,006 | -,467   |     | ,640 | -,014 | ,009  |
|   |     |            | SozNorm  | -,012 | ,009 | -,431   |     | ,667 | -,021 | ,013  |
|   |     |            | PBC      | ,252  | ,007 | 8,781   | *** | ,000 | ,048  | ,076  |
|   |     |            | PMN      | ,123  | ,010 | 4,757   | *** | ,000 | ,027  | ,065  |
|   |     |            | WetRes   | ,446  | ,012 | 11,959  | *** | ,000 | ,118  | ,165  |
|   |     |            | RadErl   | ,067  | ,010 | 1,995   | *   | ,046 | ,000  | ,039  |
|   |     |            | PKWOri   | ,016  | ,006 | ,709    |     | ,478 | -,007 | ,016  |
|   |     |            | PrvtOV   | -,001 | ,007 | -,049   |     | ,961 | -,015 | ,014  |
